# Supplementary material for: Pharmacovigilance Analysis of Vinorelbine: Cardiopulmonary and Pediatric Safety Profiles Based on FAERS and VigiBase Data
Source: Research Square preprint supplement (doi:10.21203/rs.3.rs-8245600/v1), 2025-12-02
Supplement: Supplementary file 1 [file ff54071a56cc77b01b4b0d27.docx]

**Contents**

**[Table S1](#_Toc215069225)**  [2](#_Toc215069225)

**[Table S2](#_Toc215069226)**  [3](#_Toc215069226)

**[Table S3](#_Toc215069227)**  [4](#_Toc215069227)

**[Table S4](#_Toc215069228)**  [5](#_Toc215069228)

**[Table S5](#_Toc215069229)**  [6](#_Toc215069229)

**[Table S6](#_Toc215069230)**  [7](#_Toc215069230)

**Table S1 Fourfold Table for Proportional Imbalance Method**

| Drug | Target Event Reports | Other Event Reports | Total |
| --- | --- | --- | --- |
| Target Drug | a | b | a+b |
| Other Drugs | c | d | c+d |
| Total | a+c | b+d | a+b+c+d |

**Table S2 Calculation Formulas for PRR and ROR Methods**

| Method | Calculation Formula | Threshold |
| --- | --- | --- |
| ROR |  | a≥3，95%CI＞1 |
| BCPNN | IC =log2a(a + b + c + d)/[(a + c)(a + b)]  IC025=eln(IC)-1.96[1/a+1/b+1/c+1/d]^0.5 | IC025＞0 |

**Table S3 Vinorelbine ADE Signals by SOC Classification in the VigiAccess database**

| SOC | Report count | ROR ( 95% CI ) | IC ( IC025 ) |
| --- | --- | --- | --- |
| Blood and lymphatic system disorders | 7475 | 11.74 ( 11.45 - 12.05 ) | 3.24 ( 3.20 ) |
| General disorders and administration site conditions | 5749 | 0.75 ( 0.73 - 0.77 ) | -0.33 ( -0.38 ) |
| Gastrointestinal disorders | 4578 | 1.33 ( 1.29 - 1.38 ) | 0.37 ( 0.32 ) |
| Investigations | 2990 | 1.36 ( 1.31 - 1.41 ) | 0.41 ( 0.35 ) |
| Respiratory, thoracic and mediastinal disorders | 2241 | 1.46 ( 1.39 - 1.52 ) | 0.51 ( 0.44 ) |
| Nervous system disorders | 1768 | 0.46 ( 0.43 - 0.48 ) | -1.05 ( -1.13 ) |
| Infections and infestations | 1608 | 1.13 ( 1.07 - 1.19 ) | 0.17 ( 0.08 ) |
| Skin and subcutaneous tissue disorders | 1603 | 0.48 ( 0.46 - 0.51 ) | -0.98 ( -1.06 ) |
| Neoplasms benign, malignant and unspecified(incl cyst and polyps) | 1251 | 2.57 ( 2.43 - 2.71 ) | 1.33 ( 1.23 ) |
| Metabolism and nutrition disorders | 982 | 1.55 ( 1.46 - 1.65 ) | 0.62 ( 0.51 ) |
| Musculoskeletal and connective tissue disorders | 943 | 0.49 ( 0.46 - 0.52 ) | -1.00 ( -1.10 ) |
| Vascular disorders | 931 | 1.23 ( 1.15 - 1.31 ) | 0.29 ( 0.18 ) |
| Cardiac disorders | 853 | 1.01 ( 0.94 - 1.08 ) | 0.01 ( -0.10 ) |
| Renal and urinary disorders | 457 | 0.80 ( 0.73 - 0.87 ) | -0.32 ( -0.48 ) |
| Hepatobiliary disorders | 377 | 1.33 ( 1.20 - 1.47 ) | 0.40 ( 0.23 ) |
| Psychiatric disorders | 333 | 0.19 ( 0.17 - 0.21 ) | -2.35 ( -2.53 ) |
| Eye disorders | 222 | 0.36 ( 0.31 - 0.41 ) | -1.47 ( -1.69 ) |
| Immune system disorders | 164 | 0.36 ( 0.31 - 0.41 ) | -1.45 ( -1.71 ) |
| Ear and labyrinth disorders | 163 | 0.85 ( 0.72 - 0.99 ) | -0.24 ( -0.50 ) |
| Reproductive system and breast disorders | 58 | 0.15 ( 0.12 - 0.20 ) | -2.71 ( -3.14 ) |
| Endocrine disorders | 52 | 0.72 ( 0.55 - 0.95 ) | -0.46 ( -0.92 ) |
| Pregnancy, puerperium and perinatal conditions | 45 | 0.47 ( 0.35 - 0.63 ) | -1.09 ( -1.58 ) |

**Table S4 Top 20 ADEs in VigiAccess database by Frequency of Reports for Vinorelbine**

|  | Top 20 ADEs by Frequency of Reports | Frequency | ROR ( 95% Cl ) | IC ( IC025 ) |
| --- | --- | --- | --- | --- |
| 1 | Myelosuppression | 1918 | 27.85 ( 26.59 - 29.16 ) | 4.71 ( 4.63 ) |
| 2 | Neutropenia | 1774 | 19.81 ( 18.89 - 20.87 ) | 4.23 ( 4.15 ) |
| 3 | Leukopenia | 983 | 17.29 ( 16.22 - 18.42 ) | 4.07 ( 3.95 ) |
| 4 | White blood cell count decreased | 956 | 12.66 ( 11.87 - 13.51 ) | 3.62 ( 3.46 ) |
| 5 | Anaemia | 731 | 6.83 ( 6.35 - 7.35 ) | 2.74 ( 2.63 ) |
| 6 | Thrombocytopenia | 603 | 5.93 ( 5.47 - 6.43 ) | 2.55 ( 2.42 ) |
| 7 | Neutrophil count decreased | 504 | 12.49 ( 11.43 - 13.64 ) | 3.62 ( 3.46 ) |
| 8 | Constipation | 484 | 3.91 ( 3.58 - 4.28 ) | 1.95 ( 1.81 ) |
| 9 | Febrile neutropenia | 471 | 13.32 ( 12.16 - 14.59 ) | 3.71 ( 3.54 ) |
| 10 | Injection site reaction | 380 | 4.85 ( 4.38 - 5.36 ) | 2.26 ( 2.10 ) |
| 11 | Decreased appetite | 365 | 2.43 ( 2.20 - 2.70 ) | 1.27 ( 1.12 ) |
| 12 | Pneumonia | 314 | 2.74 ( 2.45 - 3.06 ) | 1.44 ( 1.27 ) |
| 13 | Malignant neoplasm progression | 282 | 8.25 ( 7.34 - 9.28 ) | 3.03 ( 2.82 ) |
| 14 | Disease progression | 256 | 6.55 ( 5.79 - 7.40 ) | 2.70 ( 2.49 ) |
| 15 | Granulocytopenia | 225 | 21.06 ( 18.46 - 24.02 ) | 4.38 ( 4.06 ) |
| 16 | Agranulocytosis | 209 | 10.48 ( 9.14 - 12.01 ) | 3.38 ( 3.11 ) |
| 17 | Neuropathy peripheral | 196 | 3.96 ( 3.44 - 4.56 ) | 1.98 ( 1.75 ) |
| 18 | Pancytopenia | 193 | 6.69 ( 5.81 - 7.71 ) | 2.73 ( 2.60 ) |
| 19 | Dehydration | 189 | 3.76 ( 3.26 - 4.34 ) | 1.90 ( 1.67 ) |
| 20 | Sepsis | 185 | 4.42 ( 3.83 - 5.11 ) | 2.14 ( 1.90 ) |

**Table S5 Top 20 ADEs with the Strongest Signal Strength for Vinorelbine in VigiAccess**

|  | Top 20 ADEs with the Strongest Signal Strength | Frequency | ROR ( 95% CI ) | IC ( IC025 ) |
| --- | --- | --- | --- | --- |
| 1 | Pseudocirrhosis | 11 | 94.30 ( 51.78 - 171.73 ) | 6.52 ( 2.58 ) |
| 2 | Tracheal fistula | 3 | 79.20 ( 25.20 – 248.91 ) | 6.27 ( 0.48 ) |
| 3 | Toxic erythema of chemotherapy | 5 | 65.74 ( 27.12 - 159.33 ) | 6.01 ( 1.29 ) |
| 4 | Injection site phlebitis | 10 | 65.62 ( 35.90 - 122.71) | 6.01 ( 2.37 ) |
| 5 | Extravasation | 127 | 46.58 ( 39.09 - 55.52 ) | 5.52 ( 4.83 ) |
| 6 | Neutropenic sepsis | 114 | 44.33 ( 36.84 - 53.35 ) | 5.45 ( 4.72 ) |
| 7 | Neutropenic infection | 17 | 43.57 ( 27.00 - 70.31 ) | 5.43 ( 3.00 ) |
| 8 | Metastases to the mediastinum | 6 | 39.84 ( 17.81 - 89.11 ) | 5.30 ( 1.50 ) |
| 9 | Tumour pain | 17 | 37.54 ( 23.27 - 60.55 ) | 5.21 ( 2.94 ) |
| 10 | Vein discolouration | 12 | 36.67 ( 20.76 - 64.79) | 5.18 ( 2.48 ) |
| 11 | Gastrointestinal mucosal necrosis | 3 | 36.26 ( 11.62 - 113.14 ) | 5.16 ( 0.43 ) |
| 12 | Carbohydrate antigen 15-3 increased | 10 | 35.34 ( 18.95 - 65.90 ) | 5.13 ( 2.22 ) |
| 13 | Metastases to skin | 12 | 35.05 ( 19.84 - 65.90 ) | 5.12 ( 2.47 ) |
| 14 | Bronchopleural fistula | 3 | 34.86 (11.17 - 108.73 ) | 5.11 ( 0.43 ) |
| 15 | Ileus paralytic | 55 | 28.66 ( 21.97 - 37.38 ) | 4.83 ( 3.86 ) |
| 16 | Myelosuppression | 1918 | 27.85 ( 26.59 - 29.16 ) | 4.71 ( 4.63 ) |
| 17 | Bone marrow infiltration | 3 | 27.58 ( 8.85 - 85.91 ) | 4.77 ( 0.40 ) |
| 18 | Metastases to kidney | 4 | 27.44 ( 10.26 - 73.42 ) | 4.77 ( 0.83 ) |
| 19 | Lung adenocarcinoma stage Ⅳ | 3 | 27.42 ( 8.80 - 85.43 ) | 4.77 ( 0.40) |
| 20 | Febrile bone marrow aplasia | 26 | 26.82 ( 18.23 - 39.46 ) | 4.73 ( 3.21 ) |

**Table S6 Cardiac and Respiratory System ADEs Caused by Vinorelbine in VigiAccess**

| SOC  Classification | PT  Classification | Report  count | ROR ( 95% CI ) | IC ( IC025 ) |
| --- | --- | --- | --- | --- |
| Respiratory, Thoracic and Mediastinal Disorders | Tracheal fistula | 3 | 79.20 ( 25.20 - 248.91 ) | 6.27 ( 0.48 ) |
| Bronchopleural fistula | 3 | 34.86 ( 11.17 - 108.73 ) | 5.11 ( 0.43 ) |
| Malignant pleural effusion | 9 | 17.89 ( 9.29 - 34.45 ) | 4.15 ( 1.82 ) |
| Alveolitis | 8 | 13.87 ( 6.92 - 27.77 ) | 3.79 ( 1.55 ) |
| Pneumonitis aspiration | 5 | 9.42 ( 3.91 - 22.66 ) | 3.23 ( 0.79 ) |
| Pulmonary artery thrombosis | 3 | 9.08 ( 2.92 - 28.21 ) | 3.18 ( 0.14 ) |
| Pneumonitis | 90 | 7.34 ( 5.97 - 9.03 ) | 2.87 ( 2.47 ) |
| Lung infiltration | 36 | 7.23 ( 5.21 - 10.03 ) | 2.85 ( 2.15 ) |
| Pneumothorax | 35 | 6.40 ( 4.59 – 8.92 ) | 2.67 ( 1.99 ) |
| Respiratory acidosis | 7 | 5.71 ( 2.72 - 11.98) | 2.51( 0.82 ) |
| Pleuritic pain | 8 | 5.49 ( 2.75 - 10.99) | 2.46 ( 0.91 ) |
| Pleural effusion | 99 | 4.65 ( 3.82 - 5.67 ) | 2.21 ( 1.87 ) |
| Bronchospasm | 86 | 4.48 ( 3.62 - 5.53 ) | 2.16 ( 1.79 ) |
| Acute pulmonary oedema | 7 | 4.26 ( 2.03 – 8.94 ) | 2.09 ( 0.58 ) |
| Pulmonary fibrosis | 26 | 4.24 ( 2.88 - 6.22 ) | 2.08 (1.36 ) |
| Pulmonary oedema | 67 | 3.87 ( 3.04 - 4.92 ) | 1.95 ( 1.54 ) |
| Acute respiratory distress syndrome | 24 | 3.66 ( 2.45 - 5.46 ) | 1.87 ( 1.15 ) |
| Pulmonary embolism | 161 | 3.61 ( 3.09 - 4.21 ) | 1.85 (1.60 ) |
| Interstitial lung disease | 79 | 3.38 ( 2.71 - 4.21 ) | 1.75 ( 1.39 ) |
| Respiratory failure | 78 | 3.20 ( 2.56 - 4.00 ) | 1.68 ( 1.31 ) |
| Cardiac Disorders | Cor pulmonale | 4 | 10.23 (3.83 – 27.31 ) | 3.35 ( 0.55 ) |
| Acute coronary syndrome | 17 | 6.38 ( 3.96 - 10.27 ) | 2.67 ( 1.61 ) |
| Cardiotoxicity | 15 | 5.93 ( 3.58 - 9.85 ) | 2.57 ( 1.46 ) |
| Cardiac tamponade | 8 | 5.38 ( 2.69 - 10.77 ) | 2.43 ( 0.89 ) |
| Cardiopulmonary failure | 6 | 5.33 ( 2.39 - 11.88 ) | 2.41 ( 0.63 ) |
| Left ventricular failure | 8 | 4.66 ( 2.33 - 9.32 ) | 2.22 ( 0.76 ) |
| Tachyarrhythmia | 6 | 4.64 ( 2.08 - 10.33 ) | 2.21 ( 0.52 ) |
| Left ventricular dysfunction | 9 | 3.92 ( 2.04 - 7.54 ) | 1.97 ( 0.69 ) |
| Myocardial ischaemia | 16 | 3.84 ( 2.35 - 6.28 ) | 1.94 ( 1.02 ) |
| Angina pectoris | 52 | 3.30 ( 2.51 - 4.33 ) | 1.72 ( 1.26 ) |
| Cardiac failure | 73 | 2.61 ( 2.07 - 3.28) | 1.38 ( 1.01 ) |
